# Supplementary material for: Highly Variable Recombinational Landscape Modulates Efficacy of Natural Selection in Birds
Source: PubMed Central journal article supplement (PMC4231635; doi:10.1093/gbe/evu157), 2014-07-24
Supplement: supp_evu157_gbe-140421.pdf [file supp_evu157_gbe-140421.pdf]

## Supplementary information

| Comparison                                    | $\bar{d}_s$  | $\bar{d}_n/\bar{d}_s$ |
|-----------------------------------------------|--------------|-----------------------|
| <i>D. melanogaster</i> vs. <i>D. simulans</i> | 0.118        | 0.12                  |
| Mouse vs. rat                                 | 0.174        | 0.14                  |
| <b>Great tit vs. zebra finch</b>              | <b>0.111</b> | <b>0.16</b>           |
| <i>A. thaliana</i> vs. <i>A. lyrata</i>       | 0.139        | 0.21                  |
| Human vs. chimpanzee                          | 0.029        | 0.33                  |

**Table S1:** Mean estimates of  $d_s$  and  $d_n/d_s$ . Values except for the great tit vs zebra finch comparison are from Zhang et al. (2013).

| GO term    | Description                     | Observation | Expectation | P-value<br>(bonferroni) |
|------------|---------------------------------|-------------|-------------|-------------------------|
| GO:0032991 | macromolecular complex          | 162/482     | 981/4652    | 1.09E-06                |
| GO:0030529 | ribonucleoprotein complex       | 38/482      | 148/4652    | 0.000215                |
| GO:0043234 | protein complex                 | 130/482     | 843/4652    | 0.00137                 |
| GO:0010468 | regulation of gene expression   | 93/482      | 548/4652    | 0.00169                 |
| GO:0005488 | binding                         | 332/482     | 2724/4652   | 0.00369                 |
| GO:0044391 | ribosomal subunit               | 14/482      | 33/4652     | 0.00662                 |
| GO:0019222 | regulation of metabolic process | 129/482     | 859/4652    | 0.00823                 |

**Table S2:** GO terms that are enriched among genes with low  $d_n/d_s$  values.

| FDR | Recombination region | Positively Selected | Not positively selected | P-value (G-test) |
|-----|----------------------|---------------------|-------------------------|------------------|
| 20% | High                 | 17                  | 1773                    | 0.01             |
|     | Low                  | 1                   | 658                     |                  |
| 30% | High                 | 20                  | 1770                    | 0.01             |
|     | Low                  | 1                   | 658                     |                  |
| 40% | High                 | 25                  | 1765                    | 0.08             |
|     | Low                  | 4                   | 655                     |                  |
| 50% | High                 | 31                  | 1759                    | 0.11             |
|     | Low                  | 6                   | 653                     |                  |
| 20% | Jungle <sup>a</sup>  | 15                  | 1318                    | 0.1              |
|     | Desert <sup>b</sup>  | 6                   | 1125                    |                  |
| 30% | Jungle <sup>a</sup>  | 21                  | 1312                    | 0.04             |
|     | Desert <sup>b</sup>  | 8                   | 1123                    |                  |
| 40% | Jungle <sup>a</sup>  | 27                  | 1306                    | 0.05             |
|     | Desert <sup>b</sup>  | 12                  | 1119                    |                  |
| 50% | Jungle <sup>a</sup>  | 33                  | 1300                    | 0.05             |
|     | Desert <sup>b</sup>  | 16                  | 1115                    |                  |
| 10% | High                 | 8                   | 1782                    | 0.17             |
|     | Low+very low         | 6                   | 2769                    |                  |
| 20% | High                 | 17                  | 1773                    | 0.03             |
|     | Low+very low         | 12                  | 2763                    |                  |
| 30% | High                 | 20                  | 1770                    | 0.06             |
|     | Low+very low         | 17                  | 2758                    |                  |
| 40% | High                 | 25                  | 1765                    | 0.15             |
|     | Low+very low         | 26                  | 2749                    |                  |
| 50% | High                 | 31                  | 1759                    | 0.08             |
|     | Low+very low         | 31                  | 2744                    |                  |
| 10% | Jungle <sup>c</sup>  | 15                  | 2630                    | 0.01             |
|     | Desert <sup>d</sup>  | 2                   | 1706                    |                  |
| 20% | Jungle <sup>c</sup>  | 22                  | 2623                    | 0.14             |
|     | Desert <sup>d</sup>  | 8                   | 1700                    |                  |
| 30% | Jungle <sup>c</sup>  | 29                  | 2616                    | 0.07             |
|     | Desert <sup>d</sup>  | 10                  | 1698                    |                  |
| 40% | Jungle <sup>c</sup>  | 39                  | 2606                    | 0.07             |
|     | Desert <sup>d</sup>  | 15                  | 1693                    |                  |
| 50% | Jungle <sup>c</sup>  | 49                  | 2596                    | 0.07             |
|     | Desert <sup>d</sup>  | 20                  | 1688                    |                  |

<sup>a</sup> outer parts (3 Mb closest to the tip) of macrochromosomes and microchromosomes

<sup>b</sup> Inner 25% of macrochromosomes

<sup>c</sup> outer parts (15 Mb closest to the tip) of macrochromosomes and microchromosomes

<sup>d</sup> Inner 50% of macrochromosomes

**Table S3:** Location of genes with evidence for positive selection at different FDRs. Comparisons are conducted between recombination jungles and recombination deserts using G-tests. Recombination regions are classified according to their recombination rate estimates (low versus high recombination) and chromosomal positions (recombination jungle versus desert). FDR; False discovery rate

| FDR | Recombination region | Positively Selected | Not positively selected | P-value (G-test) |
|-----|----------------------|---------------------|-------------------------|------------------|
| 10% | High                 | 6                   | 1784                    | 0.05             |
|     | Low                  | 0                   | 659                     |                  |
| 10% | Jungle <sup>a</sup>  | 7                   | 1326                    | 0.003            |
|     | Desert <sup>b</sup>  | 0                   | 1131                    |                  |

<sup>a</sup> Outer parts of macrochromosomes and microchromosomes

<sup>b</sup> Inner parts of macrochromosomes

**Table S4:** Location of genes with evidence for positive selection using a different alignment strategy (PRANK and GUIDANCE). Comparisons were conducted between recombination jungles and recombination deserts using G-tests. Recombination regions were classified according to their recombination rate estimates (low versus high recombination) and chromosomal positions (recombination jungle versus desert). FDR; False discovery rate

| FDR | Recombination region | Positively Selected | Not positively selected | P-value (G-test) |
|-----|----------------------|---------------------|-------------------------|------------------|
| 10% | High                 | 7                   | 1783                    | 0.04             |
|     | Low                  | 0                   | 659                     |                  |
| 10% | Jungle <sup>a</sup>  | 9                   | 1324                    | 0.01             |
|     | Desert <sup>b</sup>  | 1                   | 1130                    |                  |

<sup>a</sup> Outer parts of macrochromosomes and microchromosomes

<sup>b</sup> Inner parts of macrochromosomes

**Table S5:** Location of genes with evidence for positive selection using model comparison M1a-M2a from PAML (Yang, 2007). Comparisons were conducted between recombination jungles and recombination deserts using G-tests. Recombination regions were classified according to their recombination rate estimates (low versus high recombination) and chromosomal positions (recombination jungle versus desert). FDR; False discovery rate

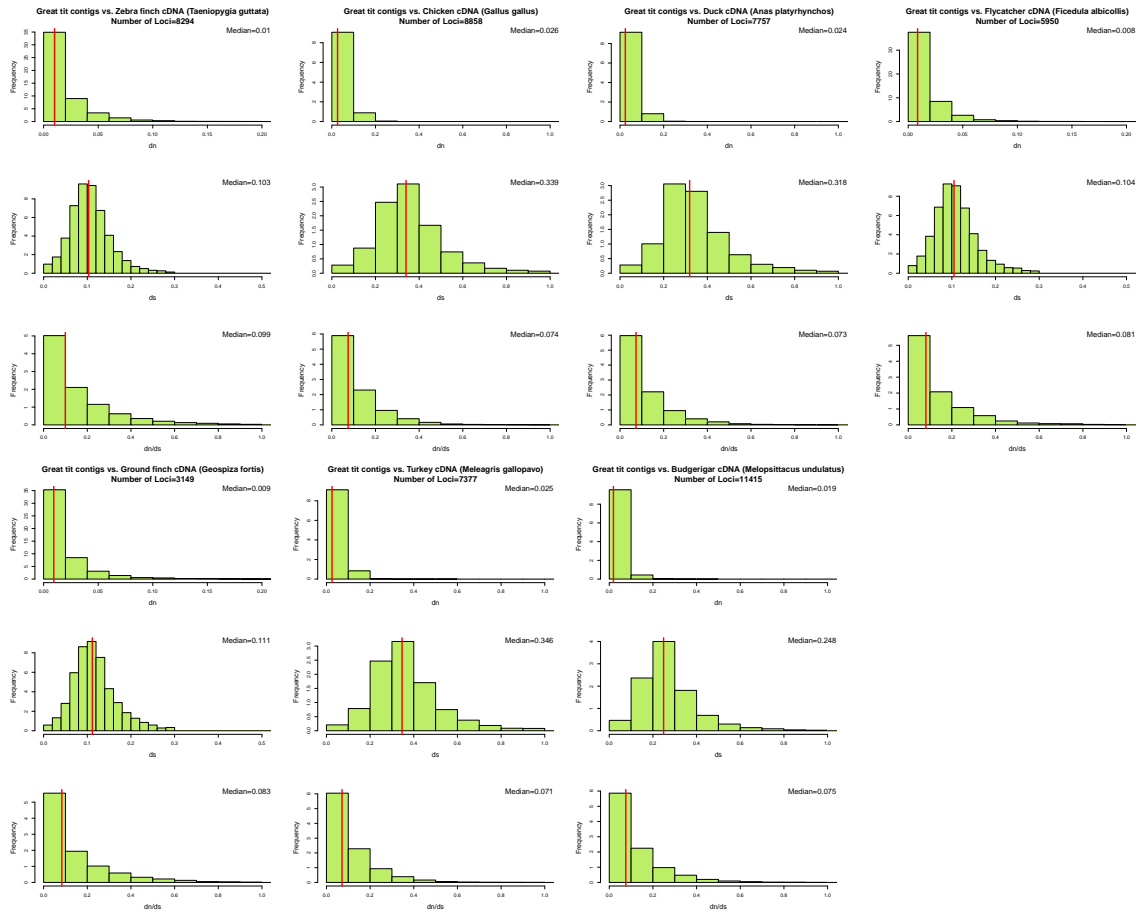

**Figure S1:** Distribution of  $d_n$ ,  $d_s$  and  $d_n/d_s$  derived from great tit contigs mapped to the chicken and zebra finch genome, respectively. Median values are indicated by solid red lines.
